# Supplementary material for: Mitochondrial Protein Cox7b Is a Metabolic Sensor Driving Brain-Specific Metastasis of Human Breast Cancer Cells
Source: MDPI journal article supplement (doi:10.3390/cancers14184371), 2022-09-08
Supplement: s1 [file s1]

**Table S1.** Short tandem repeat profiles.

| <b>STRs</b> | <b>MDA-MB-231</b> | <b>231-BR</b> | <b>231-BR-2</b> |
|-------------|-------------------|---------------|-----------------|
| D8S1179     | 13, 13            | 13, 13        | 13, 13          |
| D21S11      | 30, 33.2          | 30, 33.2      | 30, 33.2        |
| D7S820      | 8, 9              | 8, 8          | 8, 8            |
| CSF1PO      | 12, 13            | 12, 13        | 12, 13          |
| D3S1358     | 16, 16            | 16, 16        | 16, 16          |
| TH01        | 7, 9.3            | 7, 9.3        | 7, 9.3          |
| D13S317     | 13, 13            | 13, 13        | 13, 13          |
| D16S539     | 12, 12            | 12, 12        | 12, 12          |
| D2S1338     | 20, 21            | 20, 21        | 20, 21          |
| D19S433     | 11, 14            | 11, 14        | 11, 14          |
| vWA         | 15, 18            | 15, 16        | 15, 18          |
| TPOX        | 8, 9              | 8, 9          | 8, 9            |
| D18S51      | 11, 16            | 11, 15, 16    | 16, 16          |
| AMEL        | X, X              | X, X          | X, X            |
| D5S818      | 12, 12            | 12, 12        | 12, 12          |
| FGA         | 22, 23            | 22, 23        | 22, 23          |

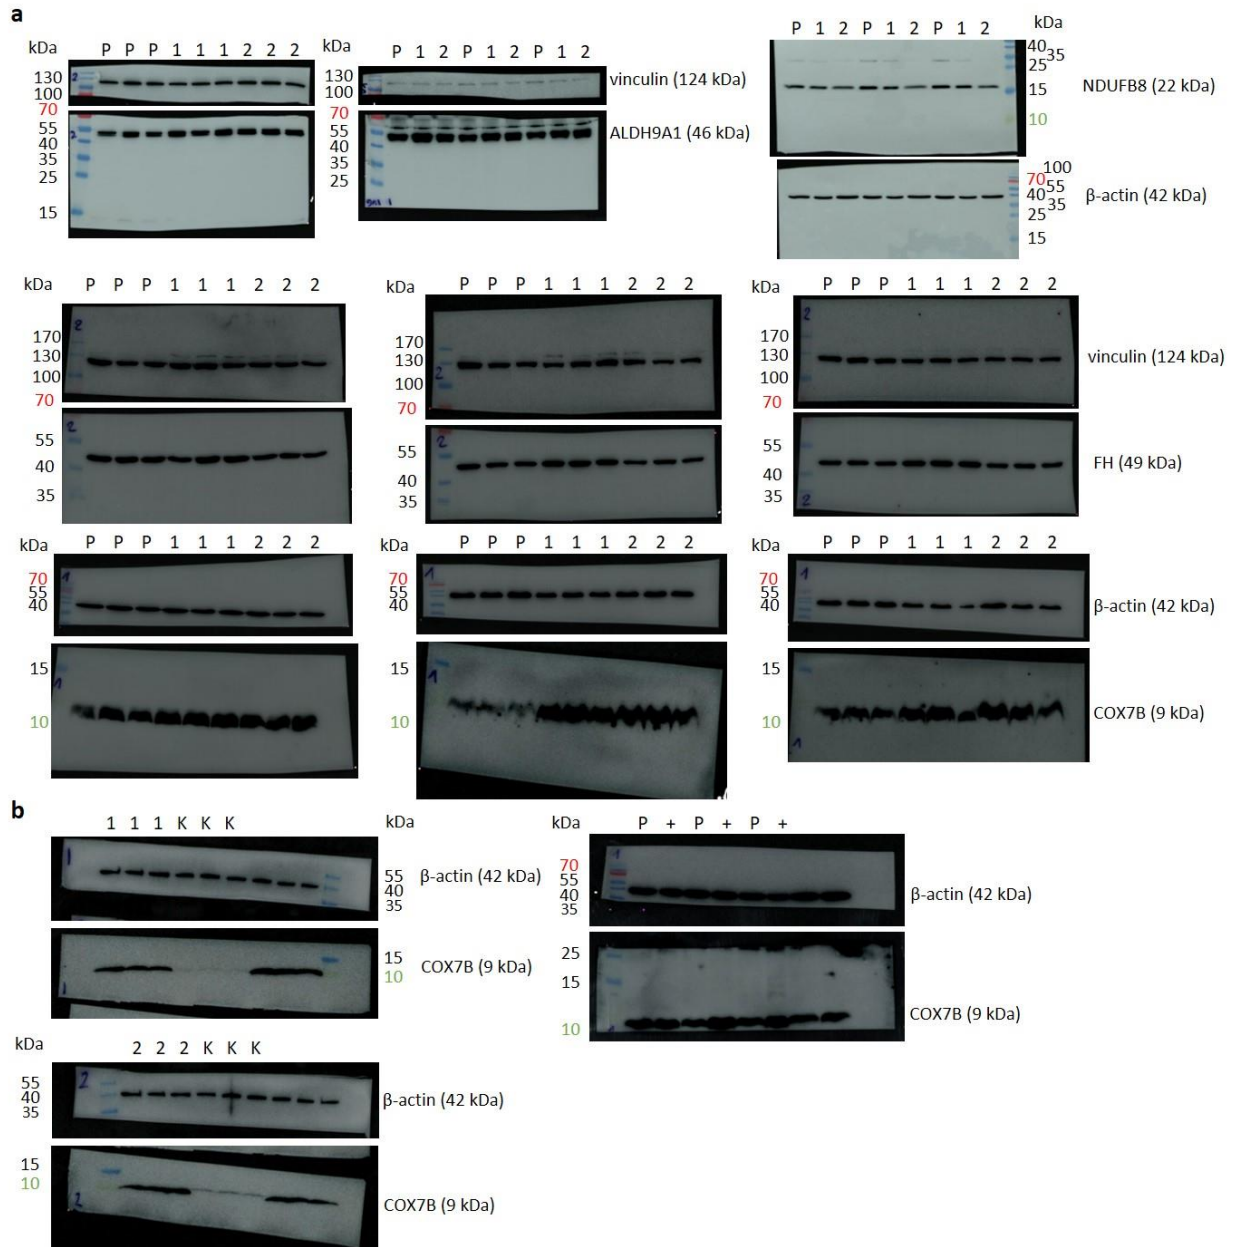

**Figure S1.** Uncropped western blot images. (a, b) Shown are whole western blot membranes corresponding to (a) Figure 3a-d, and (b) Figure S2. Note that, in order to be able to show molecular ladders, the membranes are shown at the longest exposure time (often overexposed), which does not always correspond to the acquisition time on an ECL imager 600. Abbreviations: P, parental; 1, 231-BR; 2, 231-BR-2; K, KO cells for COX7B; +, cells overexpressing COX7b.

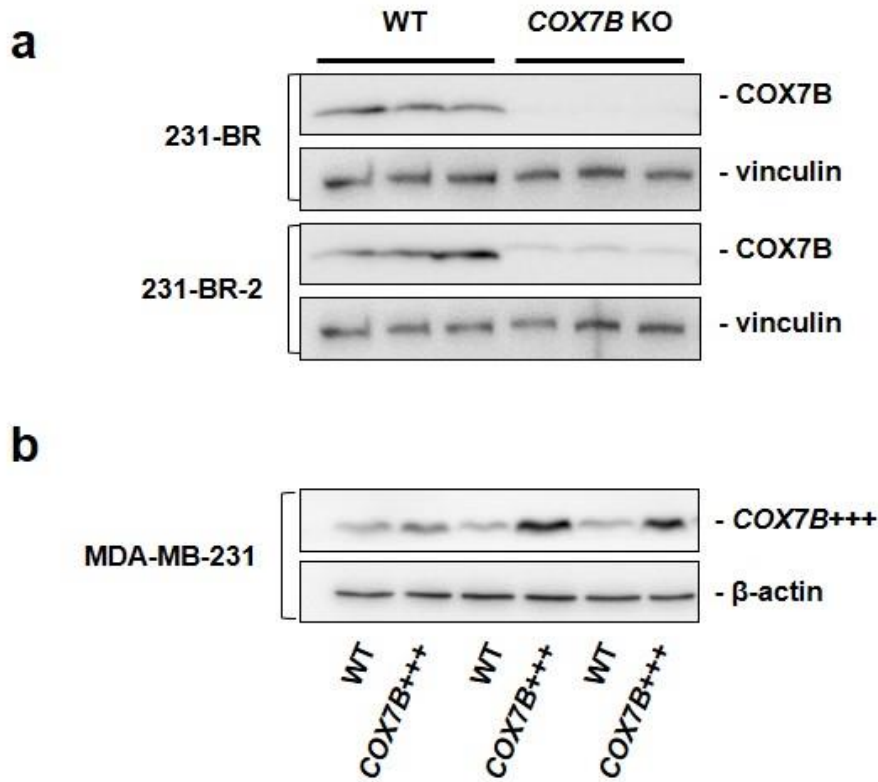

**Figure S2.** Validation of *COX7B* silencing and overexpression. (a) *COX7B* was silenced in 231-BR and 231-BR-2 brain-seeking variants using a CRISPR-Cas9 strategy. Shown are western blots reporting in triplicate on *COX7b* expression. Vinculin served as a loading control. (b) *COX7b* was overexpressed in parental MDA-MB-231 cells using a pCMV3 vector. Shown are western blots reporting in triplicate on *COX7b* expression.  $\beta$ -actin served as a loading control.

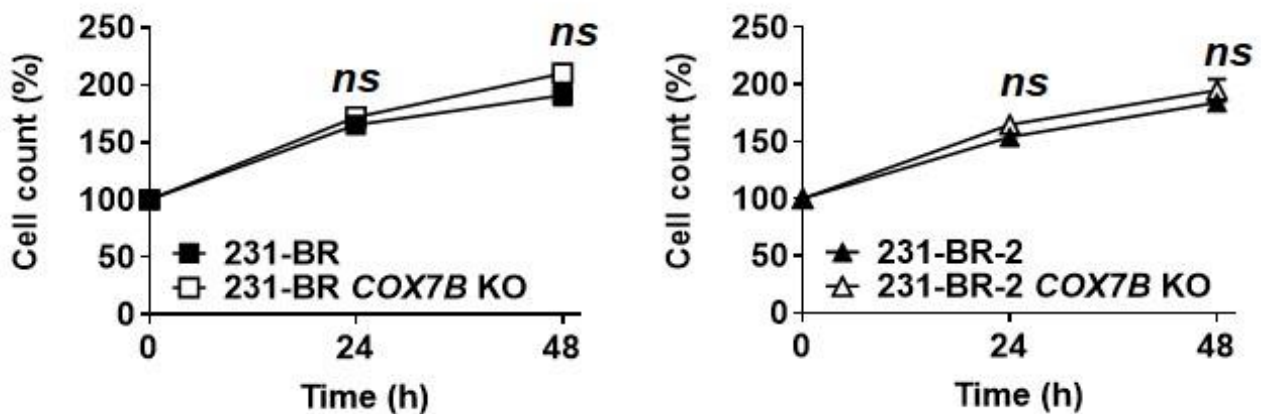

**Figure S3.** *COX7B* silencing does not alter brain-seeking variant cell numbers *in vitro*. 231-BR and 231-BR-2 cells were either wild-type or silenced for *COX7B* using a CRISPR-Cas9 strategy. Graphs show cell count (%) over time on a SpectraMax i3 spectrophotometer equipped with a MiniMax imaging cytometer, after seeding 5,000 cells per well in a 96-wells plate ( $n = 3-4$ ). Data are shown as means  $\pm$  SEM. *ns*:  $p > 0.05$  compared to MDA-MB-231 cells; using two-way ANOVA with Dunnett's post hoc test.

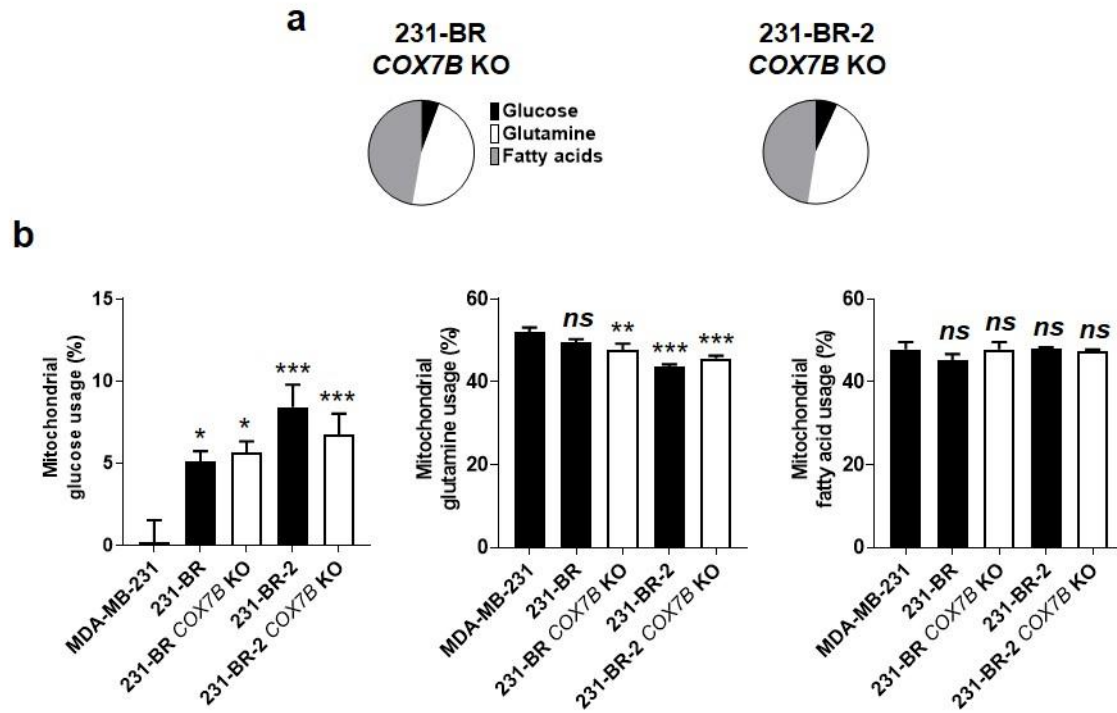

**Figure S4.** COX7B silencing does not alter the metabolic plasticity of brain-seeking variant cells. **(a, b)** 231-BR and 231-BR-2 cells were either wild-type or silenced for COX7B using a CRISPR-Cas9 strategy. **(a)** Mitochondrial fuel usage of COX7B-deficient 231-BR (left,  $n = 7-14$ ) and COX7B-deficient 231-BR-2 (right,  $n = 12-16$ ) cancer cells was determined using the Fuel Flex test kit (Agilent) on a Seahorse XF96 bioenergetics analyzer. Data are presented as pie graphs. **(b)** Mitochondrial fuel usage of parental MDA-MB-231 cells, 231-BR cells expressing or not expressing Cox7b and 231-BR-2 cells expressing or not expressing COX7b. Column graphs show mitochondrial glucose (left;  $n = 7-15$ ), glutamine (middle;  $n = 12-16$ ) and fatty acid (right;  $n = 14-16$ ) usage, where total fuel (glucose + glutamine + fatty acids) usage = 100% for each cell line. Data are shown as means  $\pm$  SEM. \*  $p < 0.05$ , \*\*  $p < 0.01$ , \*\*\*  $p < 0.005$ ,  $ns$ :  $p > 0.05$  compared to MDA-MB-231 cells; using one-way ANOVA with Dunnett's post hoc test.
